# Supplementary material
Source: PubMed Central journal article supplement (PMC4211977)
Supplement: NIHMS593815-supplement-Supp_Material.pdf [file NIHMS593815-supplement-Supp_Material.pdf]

## **Successful anti-SR-BI mAb therapy in humanized mice after challenge with HCV variants with *in vitro* resistance to SR-BI-targeting agents.**

### **Detailed Materials and Methods.**

#### ***In vitro* HCV neutralization assay.**

Genotype 2a HCVcc (Jc1wt, Jc1ΔHVR1, Jc1mtCD81, Jc1G451R and J6/JFH1 Clone2) were generated as previously described (1-3). For the receptor-targeting neutralization assay,  $1.3 \times 10^4$  Huh-7.5 cells were seeded per well in a 96-well imaging plate (BD Biosciences, Erembodegem, Belgium) (4). The following day, cells were pre-incubated for 2 hours with either 2  $\mu$ M anti-SR-BI small molecule inhibitor ITX-5061 (stock: 6 mM in DMSO, diluted in culture medium containing 0.1% DMSO), 0.2  $\mu$ g/ml anti-CD81 mAb JS81 (BD Biosciences) or different concentrations of anti-SR-BI mAb1671 (from 0.002  $\mu$ g/ml to 20  $\mu$ g/ml) in 100  $\mu$ L of culture medium. To investigate the effect of human HDL and human VLDL on HCVcc infectivity, cells were pre-incubated with 100  $\mu$ l of approximately 230  $\mu$ g HDL and 180  $\mu$ g VLDL cholesterol/ml (BTI Biomedical Technologies, Stoughton, USA) either alone or in combination with 20  $\mu$ g/ml mAb1671. Human HDL (230  $\mu$ g HDL cholesterol/ml) was also combined with JS81 (0.2  $\mu$ g/ml) and ITX-5061 (2 $\mu$ M). Then, 100  $\mu$ l of HCVcc-containing supernatant (MOI of approximately 0.004) was added to the pre-incubation medium. After 48 hours the cells were fixed with paraformaldehyde (PFA) and HCV infected cells were visualized with the anti-NS5A monoclonal antibody 9E10 in combination with an Alexa647-conjugated goat-anti-mouse antibody (Invitrogen). Images were acquired using a BD Pathway 435 High Content Bioimager (BD Biosciences) with a 10x objective.

#### ***In vitro* cell-to-cell spread assay.**

$1.4 \times 10^4$  Huh-7.5-RFP-NLS-IPS cells/well were seeded in a 96-well imaging plate (BD Biosciences, Erembodegem, Belgium) and served as acceptor cells (4). One day later, HCV Jc1wt- or Jc1ΔHVR1-transfected Huh-7.5-EGFP-IPS cells were added as donor cells in the presence of adequate amounts of a neutralizing anti-HCV antibody preventing cell-free transmission. The concentration of anti-HCV mAb during co-cultivation was selected such that it maximally inhibited cell free infectivity with minimal inhibition of cell-to-cell spread (150  $\mu$ g/ml and 1  $\mu$ g/ml for Jc1wt and Jc1ΔHVR1 co-cultures respectively). One hour prior to addition of the donor cells, Huh-7.5-RFP-NLS-IPS acceptor cells were treated with 20  $\mu$ g/ml mAb1671 or 2  $\mu$ M ITX-5061 in 100 $\mu$ l culture medium. Then, 100  $\mu$ l of donor cell suspension ( $3 \times 10^3$  cells/ml) was added on top of the pre-incubation medium. All conditions were performed in duplicate. After two days of co-cultivation, the cells were fixed with PFA and HCV-infected cells were visualized with the anti-NS5A monoclonal antibody 9E10 in combination with an Alexa647-conjugated goat-anti-mouse antibody. The number of HCV-infected acceptor cells (Alexa647<sup>pos</sup> and RFP<sup>pos</sup>) per HCV-infected donor cell (Alexa647<sup>pos</sup> and

EGFP<sup>pos</sup>) was counted in at least 100 separate HCV-positive clusters. Images were acquired using a BD Pathway 435 High Content Bioimager with a 10x objective.

#### ***In vivo HCV neutralization experiments.***

Human liver-uPA-SCID mice (chimeric mice) were produced as previously described (5, 6). All mice were transplanted with primary human hepatocytes obtained from a single donor (donor HH223; BD Biosciences, Erembodegem, Belgium). The effectiveness of the anti-SR-BI mAb1671 (400 µg per intraperitoneal injection) was evaluated in a preventive and post-exposure setting. Three mice were treated in a prophylactic manner, during which the antibody was administered one day prior to inoculation with Jc1ΔHVR1 (3.43x10<sup>5</sup> IU/mouse, a dose previously shown to be 100% infectious), followed by additional antibody injections at day 1, 5, 8, 12 and 15. In the post-exposure protocol, chimeric mice were challenged with genotype 2a HCVcc (Jc1wt, Jc1ΔHVR1, mtCD81 and Jc1G451R) on day 0 and were given mAb1671 on day 3, 5, 7, 10, 12 and 14. HCV RNA in plasma was quantified using the COBAS Ampliprep/COBAS TaqMan HCV test (Roche Diagnostics, Belgium). Due to dilution of the mouse plasma, the limit of detection (LOD) equalled 750 IU/ml. The study protocol was approved by the animal ethics committee of the Faculty of Medicine and Health Sciences of the Ghent University.

#### ***HCVcc mouse passaging and Iodixanol ultracentrifugation.***

Human liver-uPA-SCID mice were infected with cell culture produced (HCVcc) Jc1wt and Jc1ΔHVR1 (4 and 5 mice respectively). Serum was collected over a two-month infection period and pooled as humanized-mouse passaged virus stock, designated mHCV.

Gradients were formed with 10–40% iodixanol. HCVcc and mHCV were loaded on top of a preformed continuous gradient. Gradients were run to equilibrium for 16 h at 4°C and 36,000 rpm (160,000xg). Twelve fractions were collected from the top of the gradient. Buoyant densities were determined by refractometry.

#### ***Graphs and statistics.***

All graphs were prepared using Prism v4.01 (GraphPad Software Inc., La Jolla, CA). To analyze whether the difference between treatment groups was statistically significant, the data obtained from *in vitro* neutralization and cell-to-cell transmission experiments were analyzed using the Kruskal-Wallis test (Nonparametric ANOVA) with Dunn's Multiple Comparisons post-test. Data was analyzed using GraphPad InStat v3.06 (GraphPad Software Inc.).

#### ***References.***

1. Lindenbach BD, Evans MJ, Syder AJ, Wölk B, Tellinghuisen TL, Liu CC, Maruyama T, et al. Complete replication of hepatitis C virus in cell culture. *Science* 2005;309:623.
2. Wakita T, Pietschmann T, Kato T, Date T, Miyamoto M, Zhao Z, Murthy K, et al. Production of infectious hepatitis C virus in tissue culture from a cloned viral genome. *Nat Med* 2005;11:791-796.

3. Bankwitz D, Steinmann E, Bitzegeio J, Ciesek S, Friesland M, Herrmann E, Zeisel MB, et al. Hepatitis C virus hypervariable region 1 modulates receptor interactions, conceals the CD81 binding site, and protects conserved neutralizing epitopes. *J Virol* 2010;84:5751-5763.
4. Jones CT, Catanese MT, Law LM, Khetani SR, Syder AJ, Ploss A, Oh TS, et al. Real-time imaging of hepatitis C virus infection using a fluorescent cell-based reporter system. *Nat Biotechnol* 2010;28:167-171.
5. Meuleman P, Vanlandschoot P, Leroux-Roels G. A simple and rapid method to determine the zygosity of uPA-transgenic SCID mice. *Biochem Biophys Res Commun* 2003;308:375-378.
6. Meuleman P, Libbrecht L, De Vos R, de Hemptinne B, Gevaert K, Vandekerckhove J, Roskams T, et al. Morphological and biochemical characterization of a human liver in a uPA-SCID mouse chimera. *Hepatology* 2005;41:847-856.
